# Supplementary material for: Bi-alignments with affine gaps costs
Source: PubMed Central journal article supplement (PMC9109335; doi:10.1186/s13015-022-00219-7), 2022-05-16

# Additional file 1

Alignment and bi-alignment with at most one shift of the proteins DNA Polymerase I of *Escherichia* (WP\_016262675.1) and *Xanthomonas hortorum* (WP\_095575020.1); for comparison to Fig. 4 of the main text.

## Alignment (Degenerated shift-free bi-alignment)

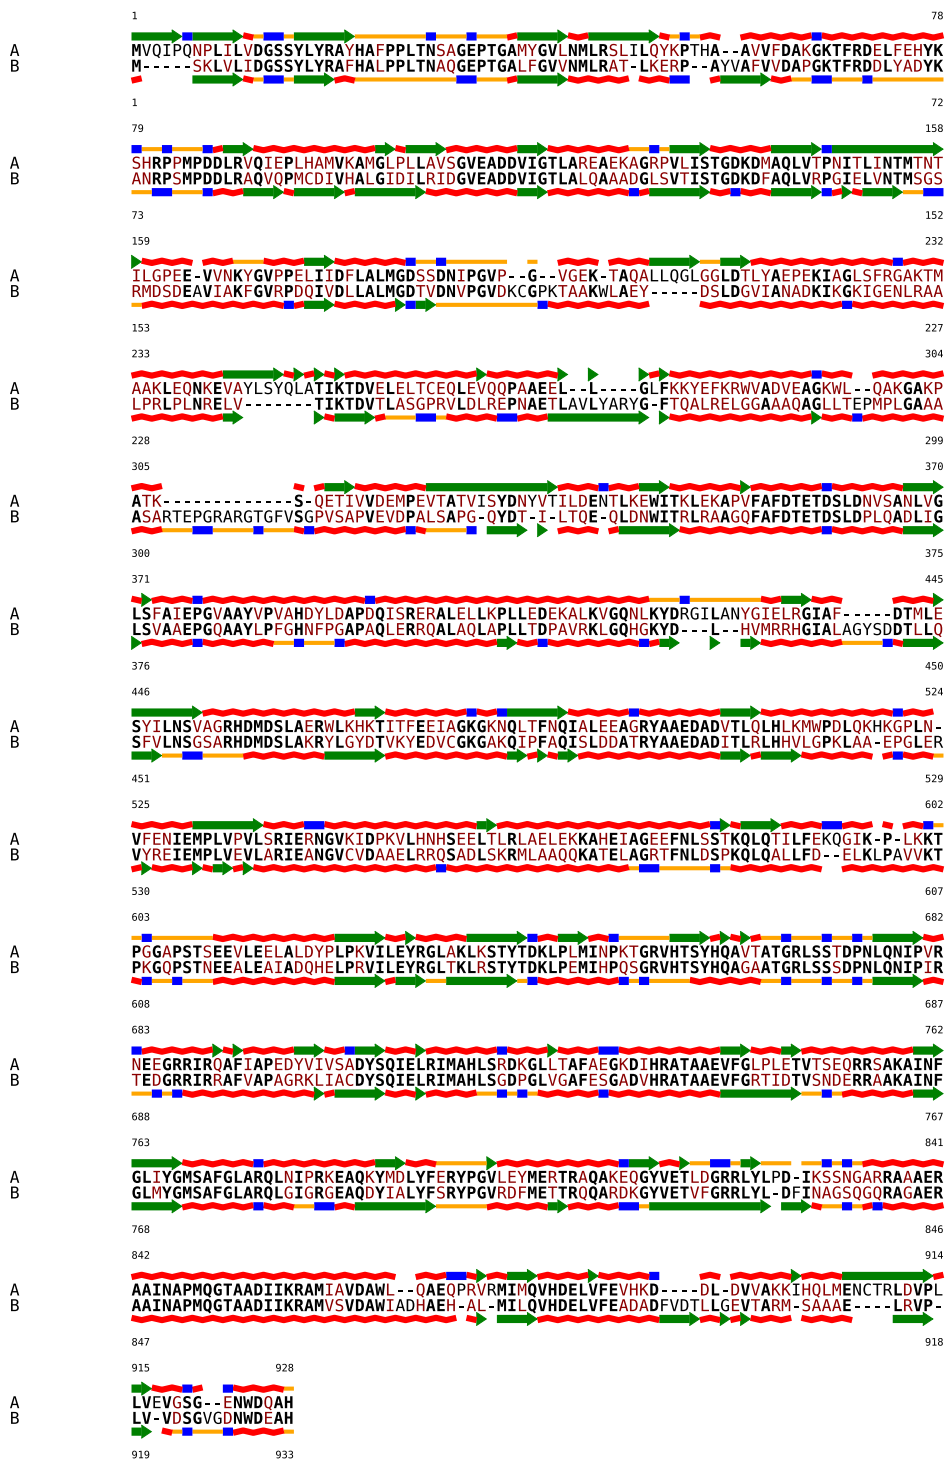

# Bi-alignment with at most one shift of either sequence in either direction

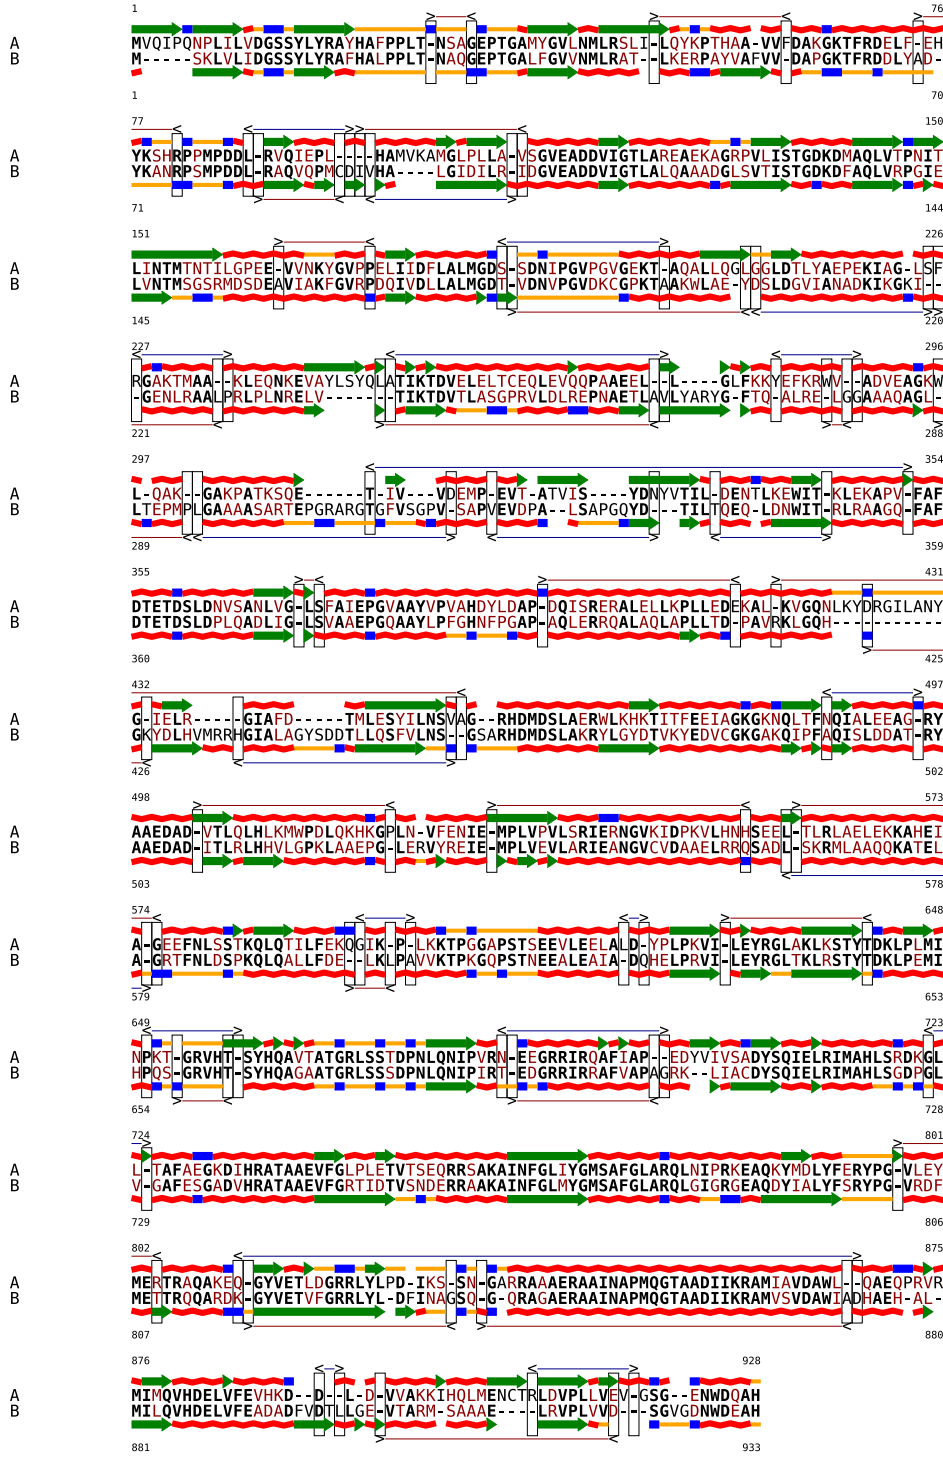

Supplement: 13015_2022_219_MOESM1_ESM.pdf [file 13015_2022_219_MOESM1_ESM.pdf]
